# Supplementary material for: Study on the thermal decomposition mechanism of graphene oxide functionalized with triaminoguanidine (GO-TAG) by molecular reactive dynamics and experiments
Source: Royal Society of Chemistry journal article supplement (doi:10.1039/c9ra04187g), 2019-01-01
Supplement: c9ra04187g2.pdf [file c9ra04187g2.pdf]

# Study on the Thermal Decomposition Mechanism of Graphene Oxide Functionalized with Triaminoguanidine (GO-TAG) by Molecular Reactive Dynamics and Experiments

Chongmin Zhang<sup>a</sup>, Xiaolong Fu<sup>b,\*</sup>, Qilong Yan<sup>c,†</sup>, Jizhen Li<sup>a</sup>, Xuezhong Fan<sup>a</sup>, Guofang Zhang<sup>b</sup>

<sup>a</sup> Xi'an Modern Chemistry Research Institute, Xi'an, 710065, China

<sup>b</sup> Key Laboratory of Applied Surface and Colloid Chemistry, MOE/School of Chemistry and Chemical Engineering, Shaanxi Normal University, Xi'an 710062, China

<sup>c</sup> Science and Technology on Combustion, Internal Flow and Thermostructure Laboratory, Northwestern Polytechnical University, Xi'an 710072, China

The parallel calculation of TAG and GO-TAG decomposition kinetics were shown in Figure S1, Figure S2 and Figure S3. The results are in good agreement, with little errors.

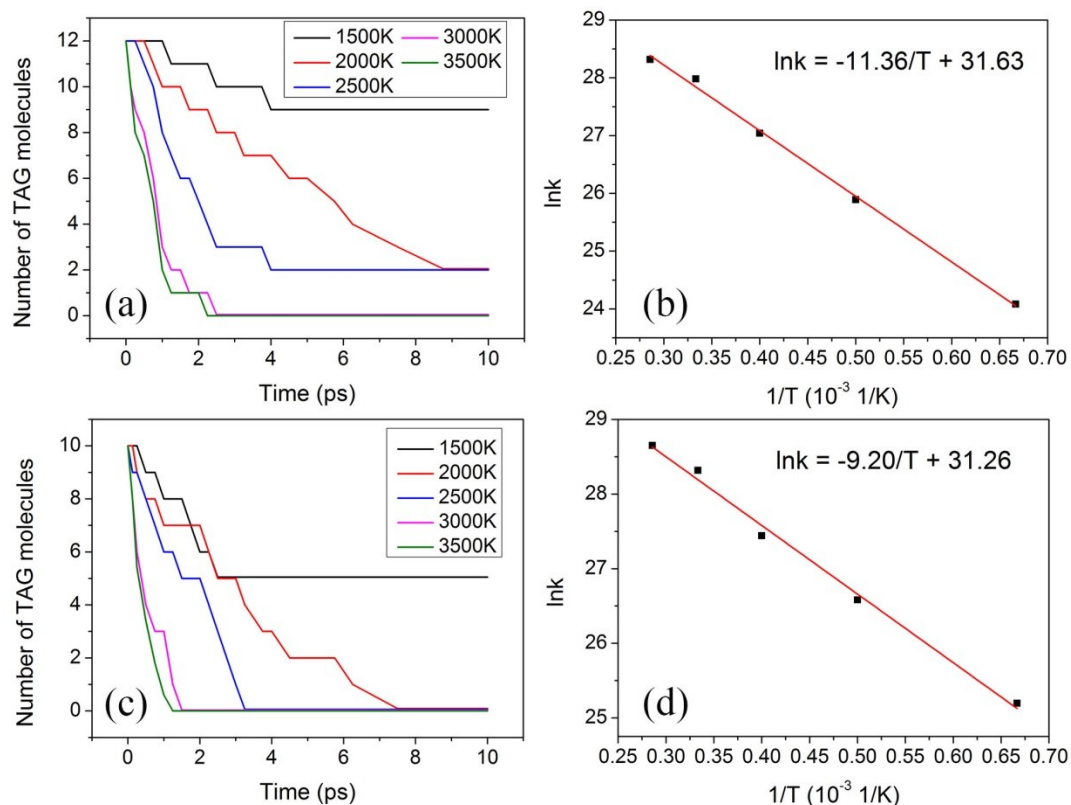

Figure S1. (a) Evolution of the pure TAG molecules over time at various temperatures; (b) Arrhenius plot of the rate constants of pure TAG molecules at various temperatures; (c) evolution of TAG molecules over time at various temperatures in GO-TAG; (d) Arrhenius plot of the rate constants of TAG molecules at various temperatures in GO-TAG.

\* Corresponding author.

E-mail address: fuxiaolong204@163.com

† Corresponding author.

E-mail address: qilongyan@nwpu.edu.cn

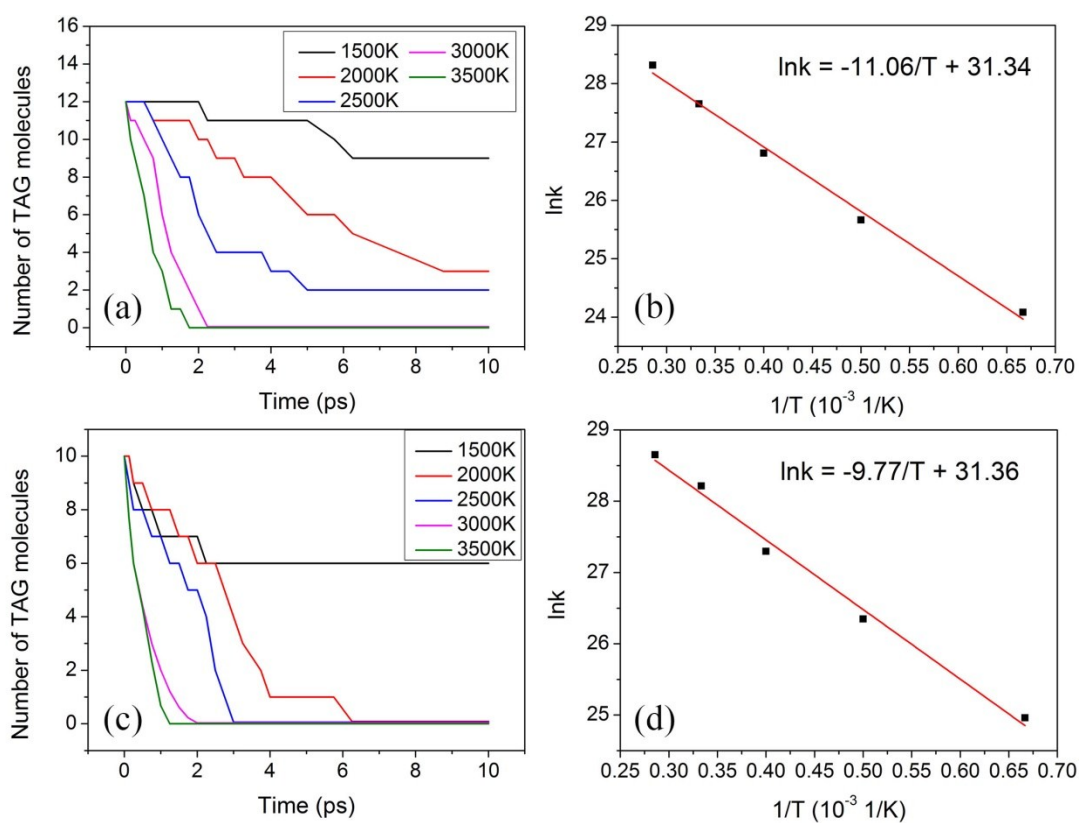

Figure S2. (a) Evolution of the pure TAG molecules over time at various temperatures; (b) Arrhenius plot of the rate constants of pure TAG molecules at various temperatures; (c) evolution of TAG molecules over time at various temperatures in GO-TAG; (d) Arrhenius plot of the rate constants of TAG molecules at various temperatures in GO-TAG.

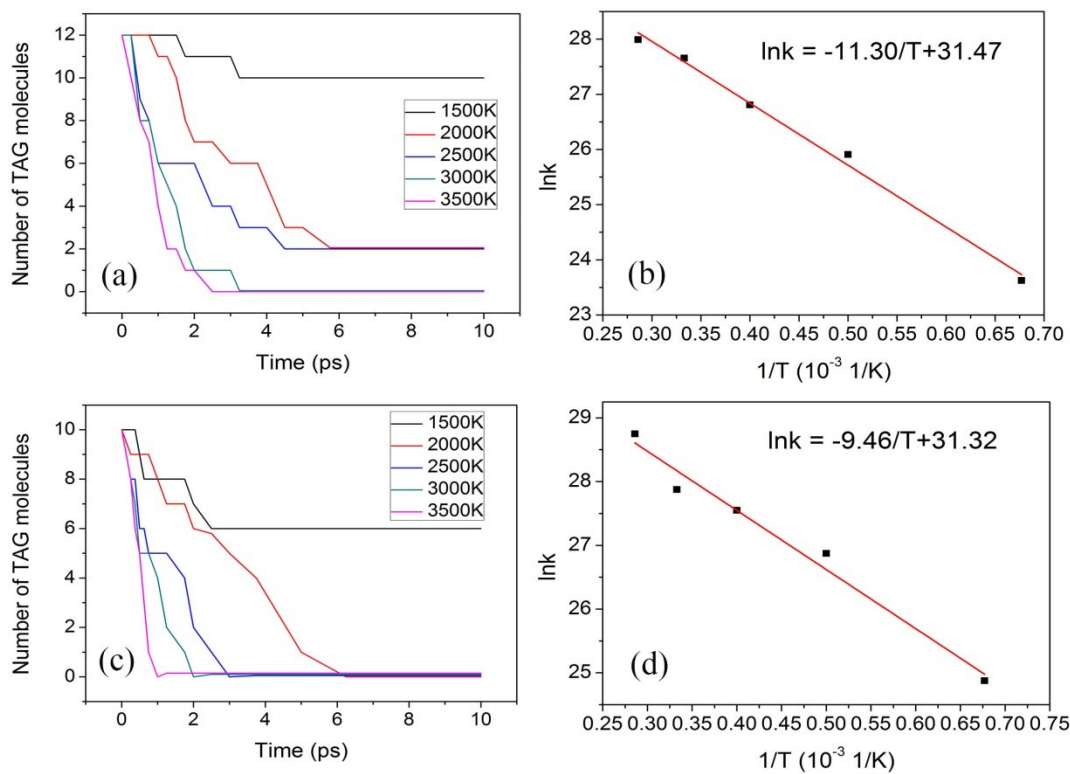

Figure S3. (a) Evolution of the pure TAG molecules over time at various temperatures; (b) Arrhenius plot of the rate constants of pure TAG molecules at various temperatures; (c) evolution of TAG molecules over time at various temperatures in GO-TAG; (d) Arrhenius plot of the rate constants of TAG molecules at various temperatures in GO-TAG.

The decomposition movies of TAG and GO-TAG are attached here as a supplement to Figure 8 and Figure 9.

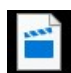

TAG.mp4

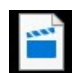

GO-TAG-1.avi
